# Supplementary material
Source: PubMed Central journal article supplement (PMC6606365)

A

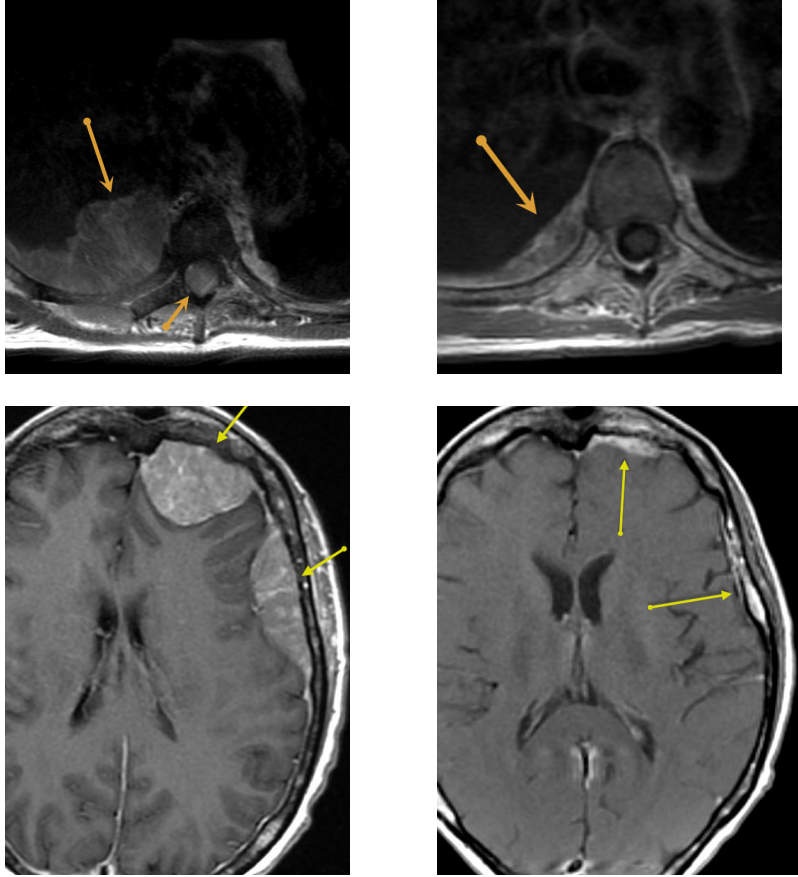

B

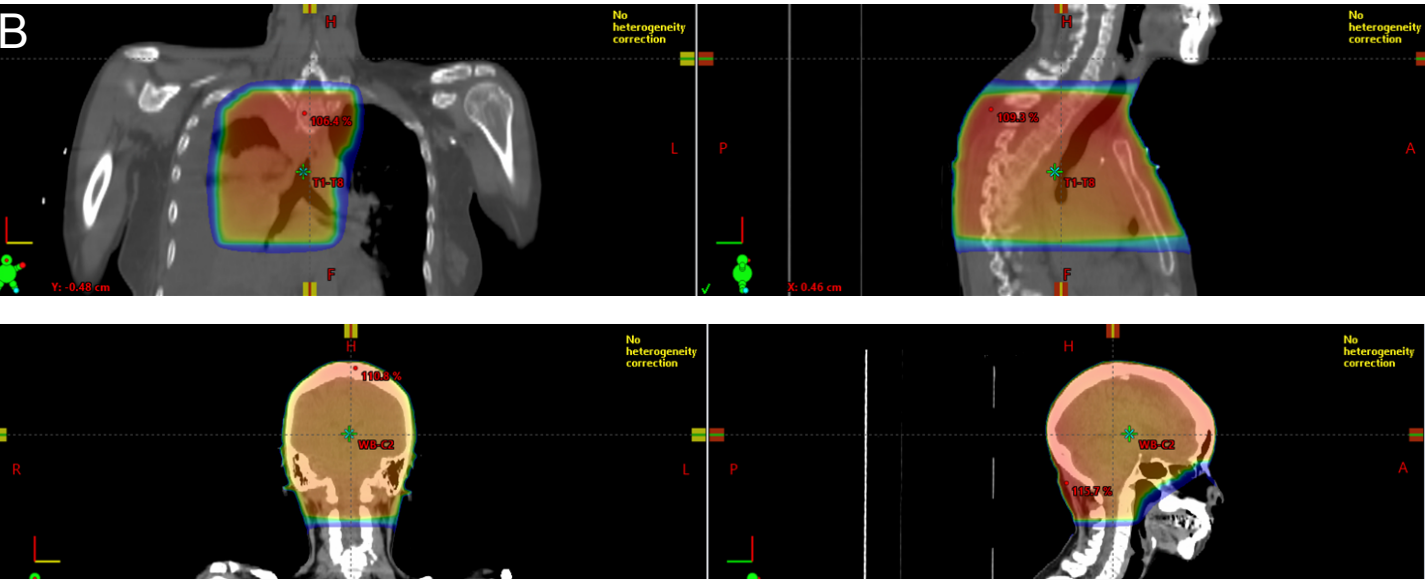

A

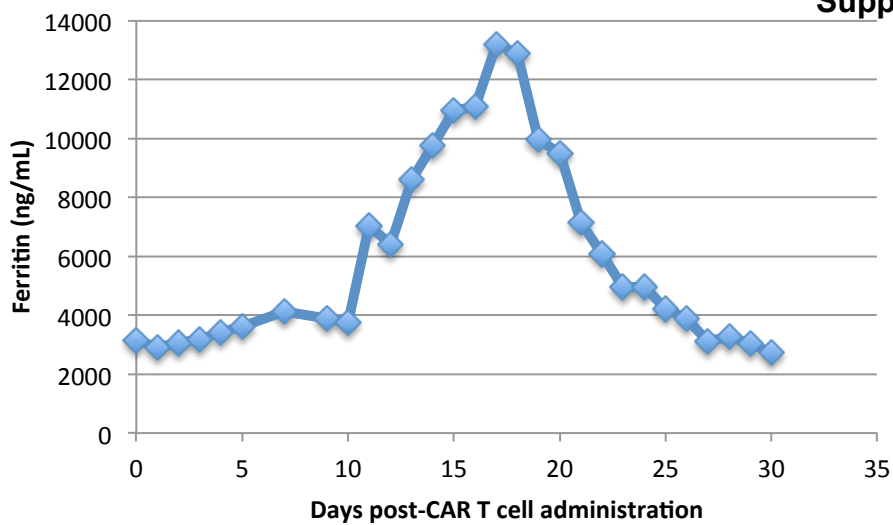

B

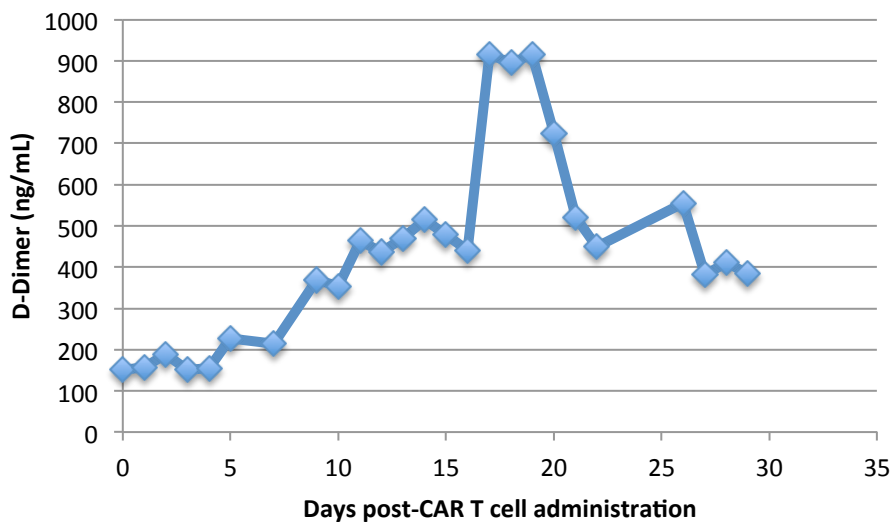

C

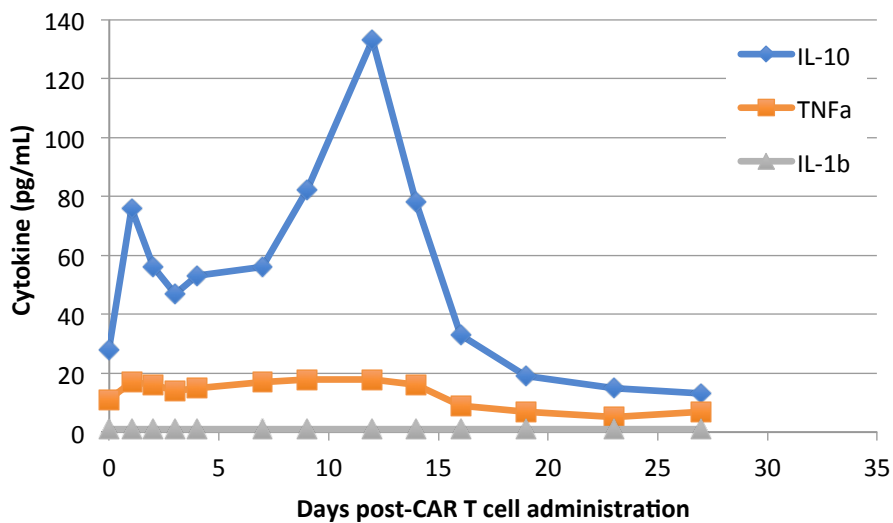

Supplementary Fig S3

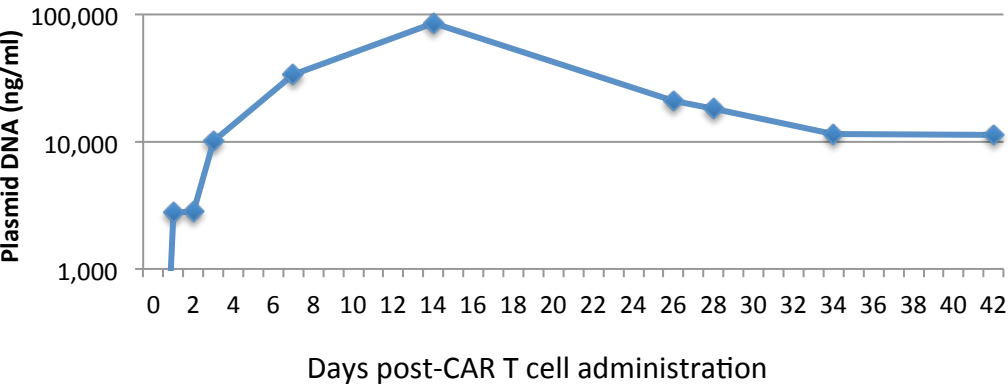

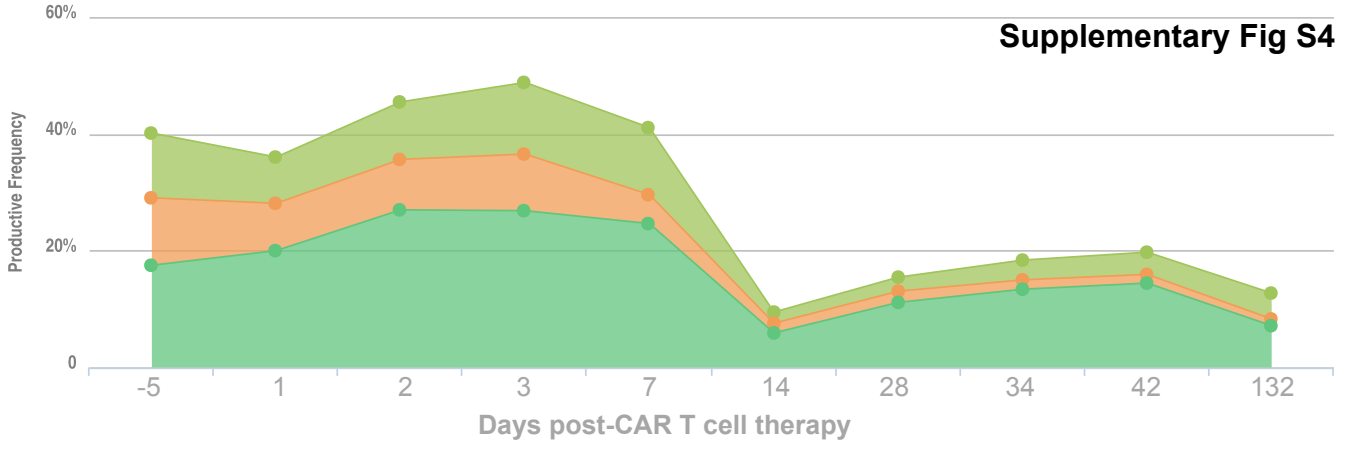

Supplement: NIHMS1528833-supplement-1.pdf [file NIHMS1528833-supplement-1.pdf]
